# Supplementary material
Source: PubMed Central journal article supplement (PMC2754626)
Supplement: pp.109.143370_1.pdf [file pp.109.143370_1.pdf]

**Supplemental Table S1. Gene model and exon coordinates for *rf1-C1* and *rf1-C2* (Kronmiller and Wise, Plant Physiology 2009)**

| Contig        | Island | Gene | Direction | Full Length   | Exons                                                                                                                                                                                                            | Predicted Function                                                               |
|---------------|--------|------|-----------|---------------|------------------------------------------------------------------------------------------------------------------------------------------------------------------------------------------------------------------|----------------------------------------------------------------------------------|
| <i>rf1-C1</i> | 3      | 1    | Forward   | 287591-288464 | 287591-287599, 287742-287817, 287904-288085, 288125-288181, 288180-288464                                                                                                                                        | heavy-metal-associated domain-containing protein, <i>Arabidopsis</i> , NP_850876 |
| <i>rf1-C1</i> | 4      | 2    | Reverse   | 344659-345858 | 345858-344659                                                                                                                                                                                                    | transcription regulator, <i>Arabidopsis</i> , NP_198156                          |
| <i>rf1-C1</i> | 5      | 3    | Forward   | 396751-397645 | 396751-396825, 397526-397645                                                                                                                                                                                     | predicted gene                                                                   |
| <i>rf1-C1</i> | 5      | 4    | Forward   | 399956-405975 | 399956-400012, 400561-400626, 401103-401214, 401596-401724, 402185-402256, 402527-402642, 403396-403472, 404840-405325, 405428-405743, 405829-405975                                                             | T-complex protein 1 subunit beta, maize, ACG33558                                |
| <i>rf1-C1</i> | 6      | 5    | Forward   | 516699-521496 | 516699-516967, 517486-517720, 517988-518342, 520319-520656, 521299-521496                                                                                                                                        | pigment defective 320, <i>Arabidopsis</i> , NP_566296                            |
| <i>rf1-C1</i> | 6      | 6    | Reverse   | 527928-528314 | 528314-527928                                                                                                                                                                                                    | MFS18 protein, maize, ACG25280                                                   |
| <i>rf1-C1</i> | 9      | 7    | Forward   | 797020-799513 | 797020-797130, 797234-797326, 797534-797593, 797766-798038, 798216-798290, 798381-798578, 798677-798727, 798808-798903, 798993-799076, 799202-799304, 799431-799513                                              | glycogen synthase kinase-3 MsK-3, maize, NP_001150105                            |
| <i>rf1-C1</i> | 9      | 8    | Reverse   | 874156-875402 | 875402-874956, 874821-874632, 874481-874429, 874297-874156                                                                                                                                                       | predicted gene, maize, NP_001130618                                              |
| <i>rf1-C2</i> | 11     | 9    | Forward   | 120996-121223 | 120996-121223                                                                                                                                                                                                    | predicted gene                                                                   |
| <i>rf1-C2</i> | 11     | 10   | Forward   | 127687-144158 | 127688-127813, 128060-128124, 128206-128278, 128826-128996, 129122-129207, 136289-136394, 136486-136532, 137527-137854, 138038-138127, 138203-138265, 138411-138485, 139556-139618, 140771-140820, 141978-142158 | mov34/MPN/PAD-1 family protein, maize, NP_001149862                              |
| <i>rf1-C2</i> | 11     | 11   | Reverse   | 129898-130077 | 130077-129898                                                                                                                                                                                                    | predicted gene                                                                   |
| <i>rf1-C2</i> | 11     | 12   | Reverse   | 382024-383247 | 383247-382024                                                                                                                                                                                                    | ubiquitin-protein ligase, <i>Ricinus</i> , EEF52805                              |
| <i>rf1-C2</i> | 14     | 13   | Reverse   | 458175-460116 | 460116-459838, 459741-459517, 459401-459147, 459059-458676, 458603-458175                                                                                                                                        | cytochrome P450, <i>Triticum</i> , AAR11387                                      |
| <i>rf1-C2</i> | 14     | 14   | Reverse   | 511265-512304 | 512304-512140, 512098-512071, 511996-511981, 511289-511265                                                                                                                                                       | predicted gene                                                                   |
